# Supplementary material for: In vitro cytotoxicity of Auger electron-emitting [67Ga]Ga-trastuzumab
Source: PubMed Central journal article supplement (PMC7099941; doi:10.1016/j.nucmedbio.2019.12.004), 2019-12-13
Supplement: EMS86062-supplement-Supplementary_Information.pdf [file EMS86062-supplement-Supplementary_Information.pdf]

## Supplementary Information

### In vitro cytotoxicity of Auger electron-emitting [ $^{67}\text{Ga}$ ]Ga-trastuzumab

Muhamad Faiz bin Othman, Elise Verger, Ines Costa, Meena Tanapirakgul, Margaret S Cooper, Cinzia Imberti, Valerie J Lewington, Philip J Blower, Samantha YA Terry

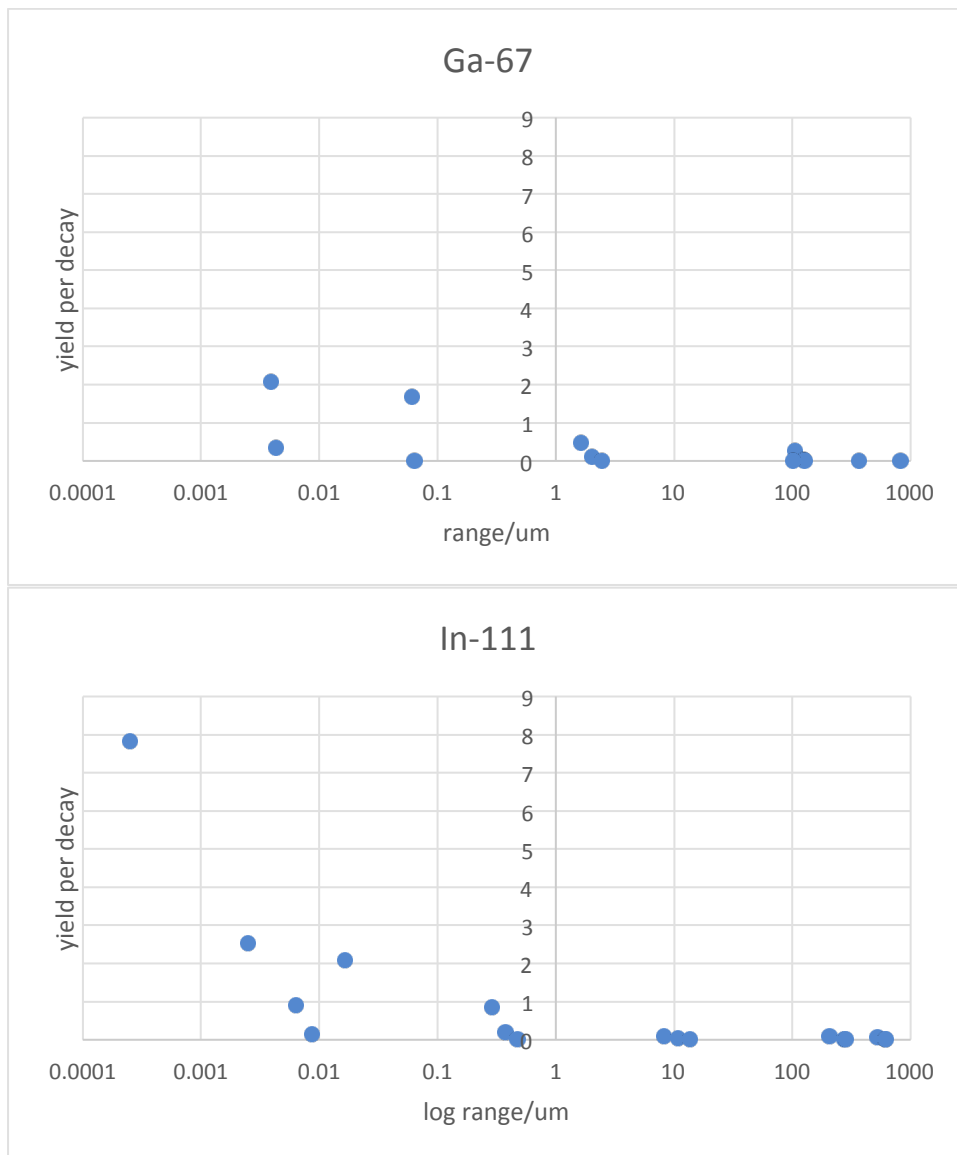

**Figure S1.** Plots of electron emission abundance versus range in tissue for gallium-67 and indium-111, including Auger electrons, Coster-Kronig electrons and internal conversion electrons. Data taken from Howell RW. Radiation spectra for Auger electron emitting radionuclides: Report No. 2 of AAPM Nuclear Medicine Task Group No. 6. Med Phys 1992;19:1371-1383.
